# Supplementary material for: Identification of putative drug targets for human sperm-egg interaction defect using protein network approach
Source: PubMed Central journal article supplement (PMC4506605; doi:10.1186/s12918-015-0186-7), 2015-07-18
Supplement: 12918_2015_186_MOESM1_ESM.pdf [file 12918_2015_186_MOESM1_ESM.pdf]

**Additional file**

**Table S1:** The Physical PPIs in Sperm-Egg Interaction Network

| <b>Feature Category</b>     | <b>Database</b> | <b>No. of Interactions</b> |
|-----------------------------|-----------------|----------------------------|
| <b>Physical Interaction</b> | DIP             | 7                          |
|                             | BIND            | 33                         |
|                             | HPRD            | 172                        |
|                             | IntAct          | 13                         |
|                             | MINT            | 9                          |
|                             | MIPS            | 6                          |
|                             | APID            | 230                        |
|                             | BioGRID         | 138                        |
| <b>Total:</b>               |                 | <b>239</b>                 |

**Table S2:** The Functional and Predicted PPIs from GeneMANIA Database in Sperm-Egg Interaction Network

| <b>Feature Category</b>       | <b>Reference</b>                                                                                  | <b>Number of PPI</b> |
|-------------------------------|---------------------------------------------------------------------------------------------------|----------------------|
| <b>Co-expression</b>          | Gene Expression Omnibus (GEO) (Barrett et al., 2013)                                              | 793                  |
| <b>Genetic interaction</b>    | BioGRID (Stark et al., 2006)                                                                      | 333                  |
| <b>Co-localization</b>        | Gene Expression Omnibus (GEO) (Barrett et al., 2013), Gene-Ontology (GO) (Carbon et al., 2009)    | 190                  |
| <b>Pathway</b>                | Reactome (Vastrik et al., 2007), BioCyc (Karp et al., 2005), PathwayCommons (Cerami et al., 2011) | 224                  |
| <b>Shared protein domains</b> | InterPro (Apweiler et al., 2000), SMART (Letunic et al., 2012), Pfam (Bateman et al., 2004)       | 178                  |
| <b>Total:</b>                 |                                                                                                   | <b>1399</b>          |
